# Supplementary material
Source: publisher figshare collection journal article supplement (https://acs.figshare.com/ndownloader/files/22762430)
Supplement: Supplementary file 1 [file 22762430]

## **Supplementary data**

### **Understanding the mechanism and interaction potential of the designed peptide and preparation of composite fiber matrix for fungal keratitis**

Amit Chatterjee<sup>1,2</sup>, Hemavathy Nagarajan<sup>3</sup>, Prema Padmanabhan<sup>5</sup>, Umashankar Vetrivel<sup>3</sup>, Kulandhai Lily Therese<sup>4</sup>, Narayanan Janakiraman <sup>\*1</sup>

<sup>1</sup>Department of Nanobiotechnology, Vision Research Foundation, Sankara Nethralaya, Chennai, Tamil Nadu, India

<sup>2</sup>School of Chemical and Biotechnology, SASTRA UNIVERSITY, Tanjore, Tamil Nadu, India

<sup>3</sup>Centre for Bioinformatics, Vision Research Foundation, Sankara Nethralaya, Chennai, Tamil Nadu India

<sup>4</sup>L&T Microbiology Research Centre, Vision Research Foundation, Sankara Nethralaya, Chennai, Tamil Nadu India

<sup>5</sup>Department of Cornea, Medical Research Foundation, Sankara Nethralaya, Chennai, Tamil Nadu, India

Correspondence: #Dr.Janakiraman Narayanan, Department of Nanobiotechnology, KNBIRVO Block, Vision Research Foundation, Sankara Nethralaya campus, 18/41, College road Nungambakkam, Chennai, Tamil Nadu, India 600006, Tel-+91-44-28271616, (Ext) 1358, Fax-+91-44-28254180, Email: drjrn15@gmail.com

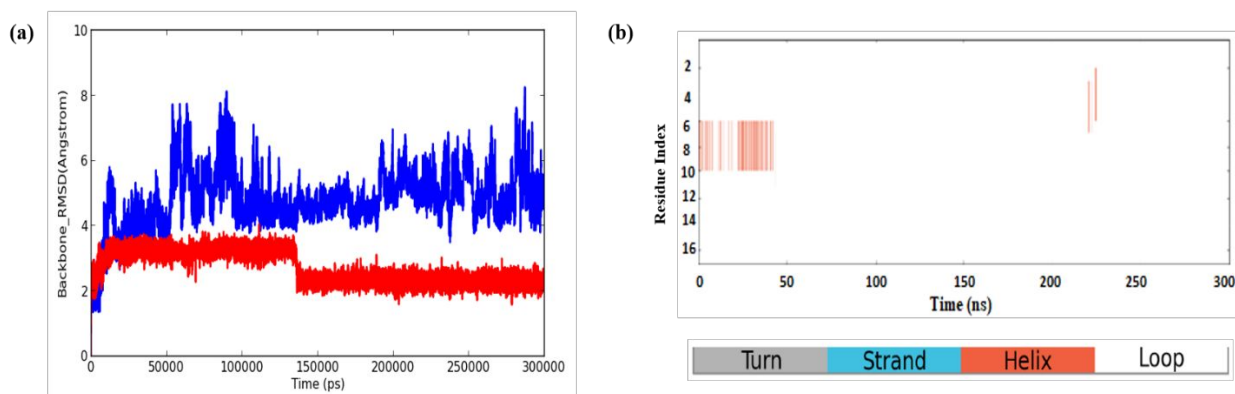

S1. MD analysis of the Complex VRF005-Natamycin (a) Backbone RMSD of VRF005 (Blue colour) and Natamycin (Red colour) throughout the MD simulation run (b) Secondary structure analysis of Peptide VRF005 throughout MD production run.

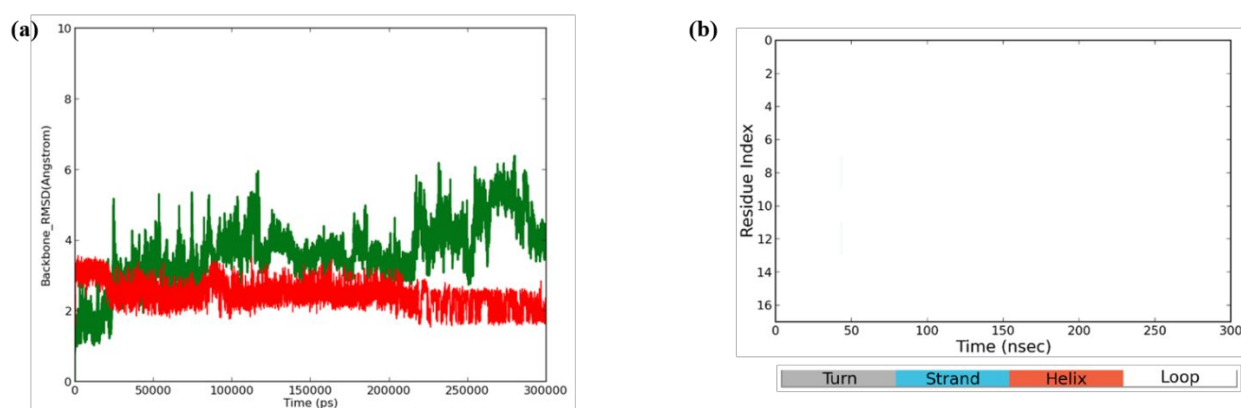

S2. MD analysis of the Complex VRF007-Natamycin (a) Backbone RMSD of VRF007 (Green colour) and Natamycin (Red colour) throughout the MD simulation run (b) Secondary structure analysis of Peptide VRF007 throughout MD production run.
